# Supplementary material
Source: PubMed Central journal article supplement (PMC4011344)
Supplement: cr201429x1.pdf [file cr201429x1.pdf]

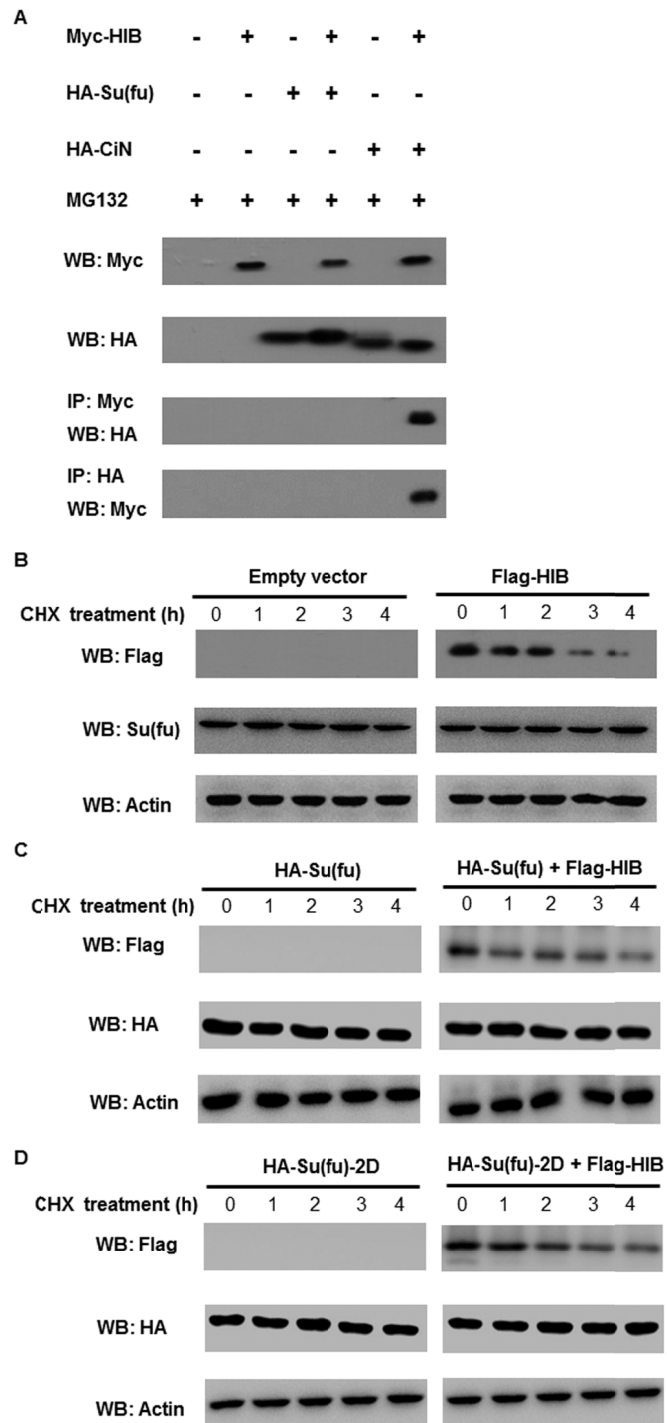

**Supplementary information, Figure S1** HIB neither binds Su(fu) nor affects the stability of Su(fu) protein in S2 cells. **(A)** HIB doesn't bind Su(fu). *HA-Su(fu)* and *Myc-HIB* were cotransfected into S2 cells, immunoprecipitated with anti-HA and anti-Myc antibodies respectively, and followed by western blot assay using antibodies against HA or Myc. CiN was used as a positive control. **(B)** The stability of endogenous Su(fu) was not affected by

HIB in S2 cells. Cells were transfected with the same amount HIB and treated with CHX at 20 ug/ul for the indicated periods of time before cell harvest. Actin serves as a loading control.

**(C-D)** HIB did not change the stability of exogenous HA-Su(fu) and HA-Su(fu)-2D in S2 cells. Cells were transfected with the same amount Su(fu) or Su(fu)-2D without or with Flag-HIB and treated with CHX for the indicated intervals before cell harvest.
