# Supplementary material
Source: PubMed Central journal article supplement (PMC4011344)
Supplement: cr201429x2.pdf [file cr201429x2.pdf]

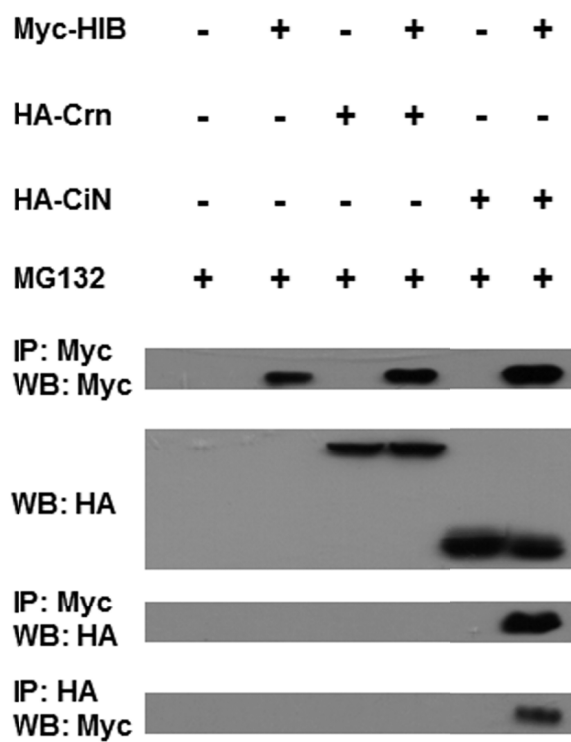

**Supplementary information, Figure S2** HIB doesn't bind Crn in S2 cells. *HA-Crn* and *Myc-HIB* were cotransfected in S2 cells. Cell extracts were immunoprecipitated, followed by western blot assay using antibodies against HA or Myc. CiN was used as a positive control.
