# Supplementary material
Source: PubMed Central journal article supplement (PMC4011344)
Supplement: cr201429x3.pdf [file cr201429x3.pdf]

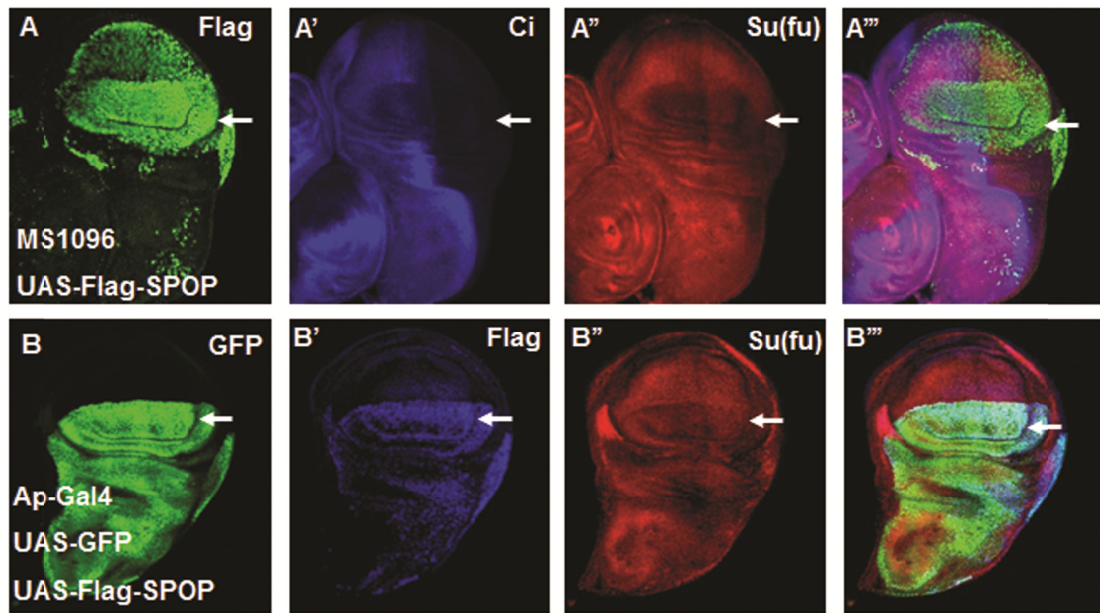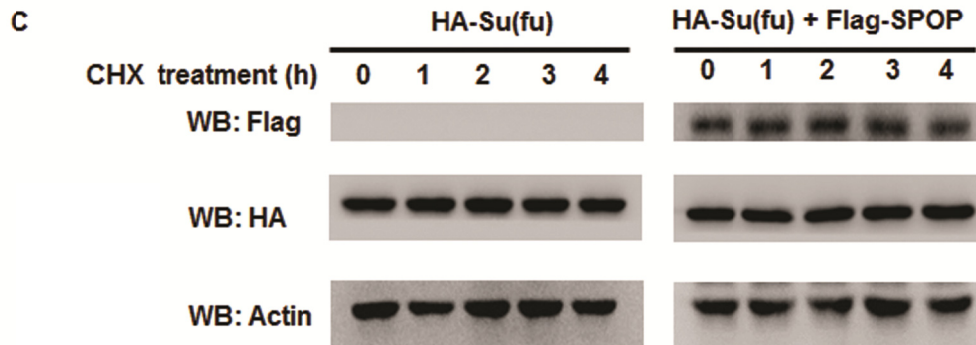

**Supplementary information, Figure S3** SPOP downregulates endogenous Su(fu) in wing discs but does not change the stability of exogenous HA-Su(fu) in S2 cells. (A-B''') Overexpression of *UAS-Flag-SPOP* with *MS1096* or *Ap-Gal4* affected endogenous Su(fu) level as revealed by staining with anti-Su(fu) antibody. (C) SPOP does not change the stability of exogenous HA-Su(fu) in S2 cells. Cells were transfected with the same amount Su(fu) with or without SPOP and treated with CHX for the indicated intervals, followed by western blot analysis with the indicated antibodies. Actin serves as loading controls.
