# Supplementary material
Source: PubMed Central journal article supplement (PMC4011344)
Supplement: cr201429x4.pdf [file cr201429x4.pdf]

**A**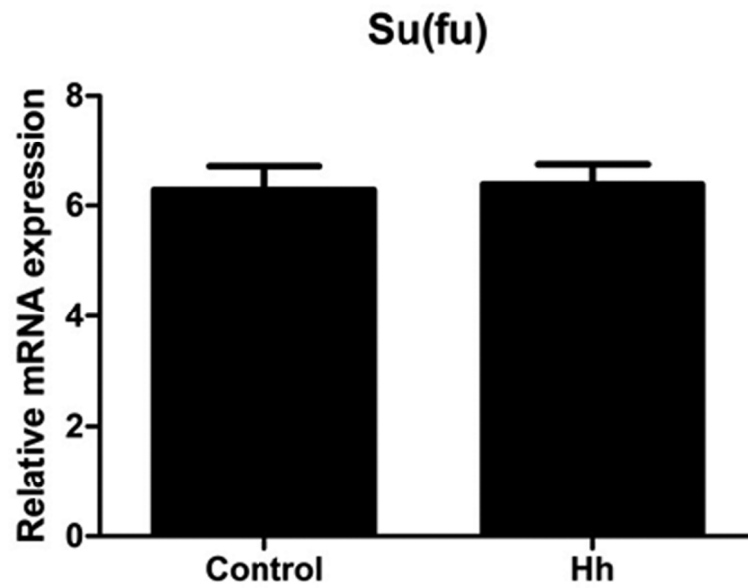**B**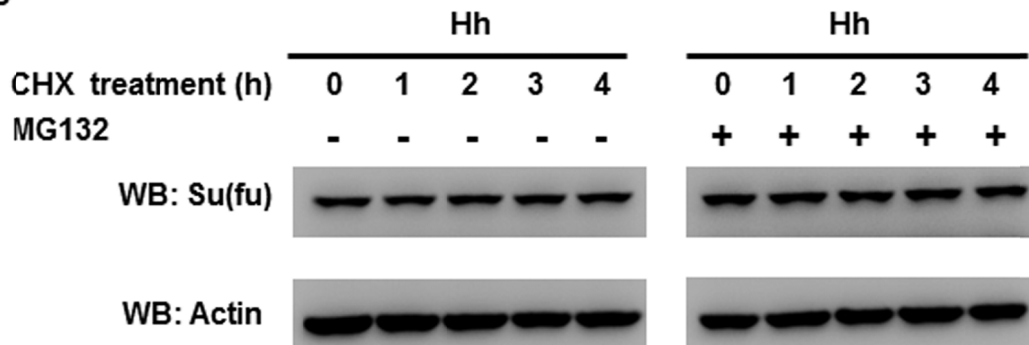

**Supplementary information, Figure S4** Hh doesn't affect *su(fu)* mRNA level or the stability of Su(fu) in the S2 cells. **(A)** Overexpression of *UAS-Hh* didn't change *su(fu)* mRNA level detected by Q-PCR. **(B)** Hh does not affect the stability of Su(fu). Cells were transfected with the same amount *UAS-Hh* plasmid and treated with fresh Hh-conditioned medium, treated with or without CHX and MG132, followed by western blot analysis. Actin serves as loading controls.
