# Supplementary material
Source: PubMed Central journal article supplement (PMC4011344)
Supplement: cr201429x6.pdf [file cr201429x6.pdf]

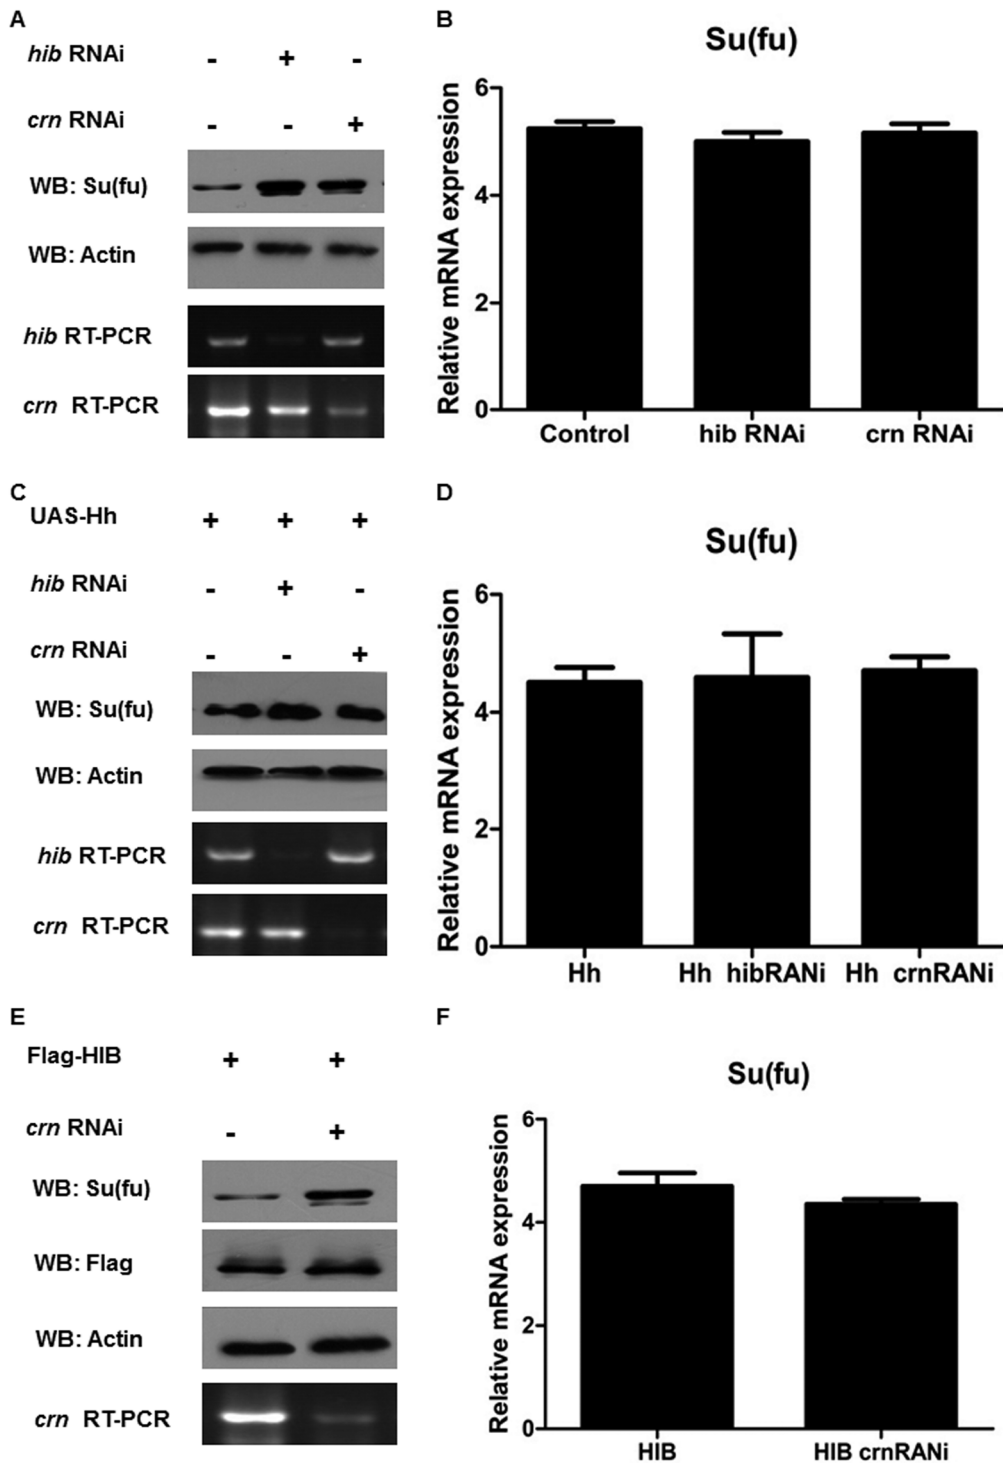

**Supplementary information, Figure S6** HIB-Crn affects Su(fu) level in the S2 cells. **(A)** Knockdown of *hib* and *crn* in S2 cells by RNAis upregulated Su(fu) protein level. Actin was used as a loading control. The effect of respective RNAi was assessed by RT-PCR. **(B)** *hib* and *crn* knockdown didn't change *su(fu)* mRNA level in S2 cells as determined by Q-PCR analysis. **(C-D)** *hib* RNAi or *crn* RNAi in the presence of Hh overexpression upregulated Su(fu) protein level but did not change its mRNA level. **(E-F)** *crn* RNAi in the presence of HIB overexpression upregulated Su(fu) protein level, but did not change *su(fu)* mRNA level in S2 cells.
