# Supplementary material
Source: PubMed Central journal article supplement (PMC4011344)
Supplement: cr201429x7.pdf [file cr201429x7.pdf]

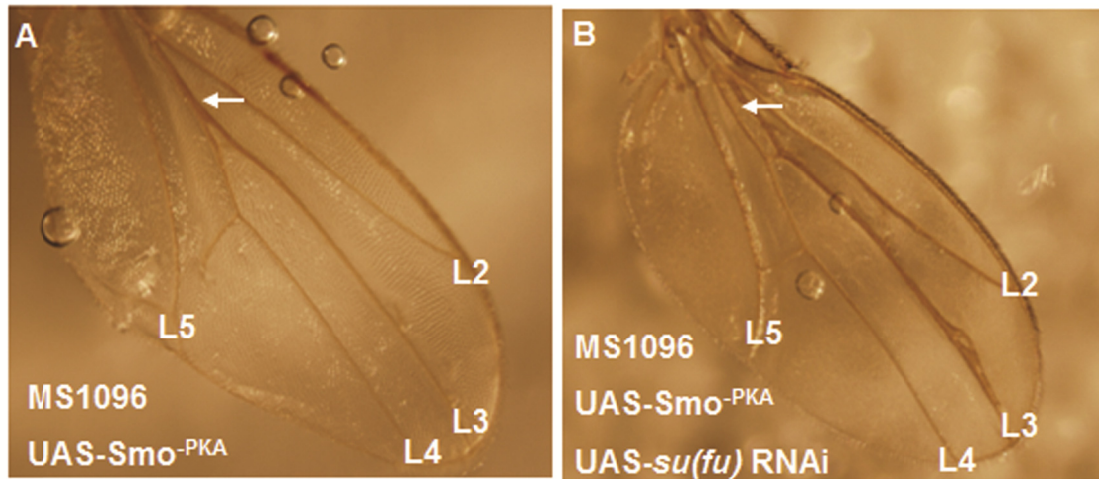

**Supplementary information, Figure S7** Loss of Su(fu) alters Hh signaling in a genetic sensitized background. **(A)** Expression of a dominant negative form of Smo (Smo<sup>-PKA</sup>) using *MS1096* resulted in attenuating Hh signal activity as manifested by fused proximal region and narrower width of distal region between vein 3 and 4 of adult wings (indicated by arrow in A). Individual veins of the adult wings are indicated by the numbers. **(B)** *su(fu)* RNAi in wings expressing Smo<sup>-PKA</sup> suppressed Hh signaling defects, which is indicated by the restoration of region between vein 3 and 4.
