# Supplementary material
Source: PubMed Central journal article supplement (PMC4011344)
Supplement: cr201429x8.pdf [file cr201429x8.pdf]

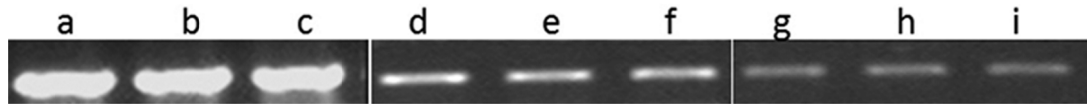

**Supplementary information, Figure S8** HIB doesn't affect *su(fu)* mRNA nuclear export. **(a-i)** RNA was isolated from S2 cells transfected with *UAS-HA-Crn*, *UAS-Flag-HIB*, or both. The coding region of *su(fu)* mRNA was amplified by RT-PCR. **(a-c)** RT-PCR products from total *su(fu)* mRNA transfected with *UAS-HA-Crn* (a), *UAS-HA-HIB* (b), or both (c). **(d-f)** RT-PCR products from nuclear *su(fu)* mRNA transfected with *UAS-HA-Crn*(d), *UAS-HA-HIB* (e), or both (f). **(g-i)** RT-PCR products from cytoplasmic *su(fu)* mRNA transfected with *UAS-HA-Crn*(g), *UAS-HA-HIB*(h), or both (i).
