# Supplementary material
Source: PubMed Central journal article supplement (PMC4011344)
Supplement: cr201429x9.pdf [file cr201429x9.pdf]

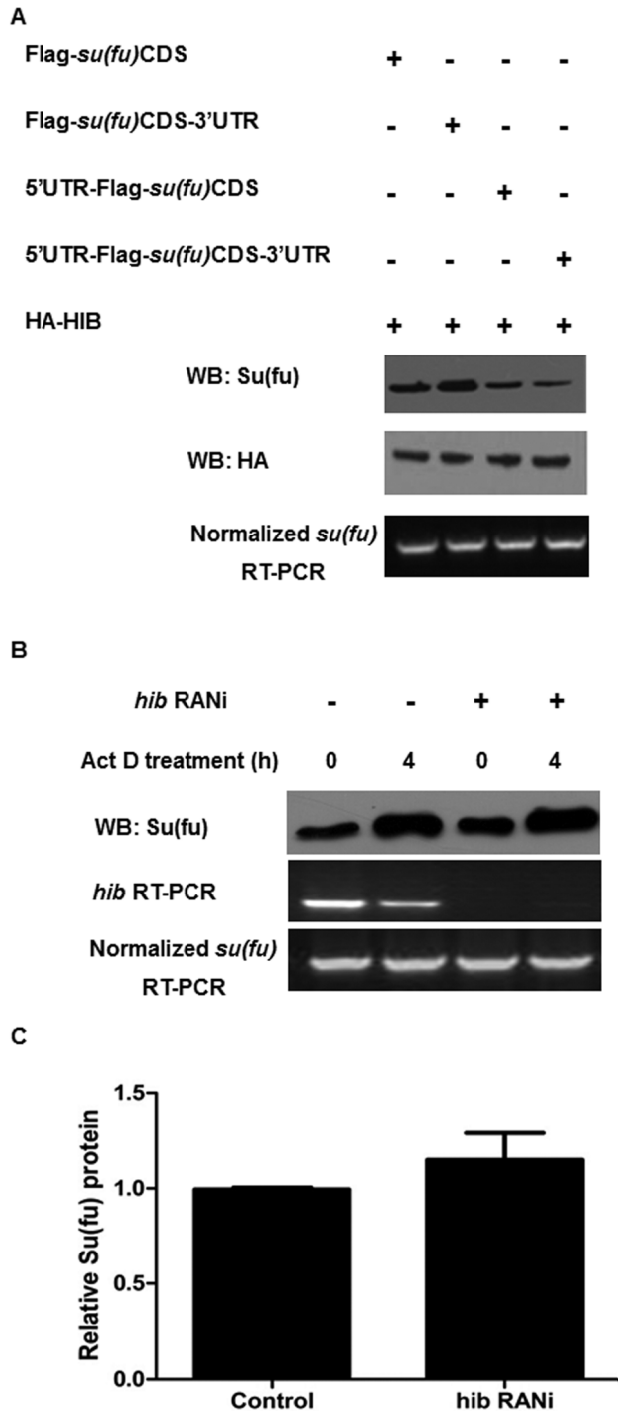

**Supplementary information, Figure S9** HIB may affect *su(fu)* translation. **(A)** 5'- and 3'-UTR of *su(fu)* affect its protein level. S2 cells were transfected with the same amount of *Flag-su(fu)*CDS, 5'-UTR-*Flag-su(fu)*CDS, *Flag-su(fu)*CDS-3'-UTR or 5'-UTR-*Flag-su(fu)*CDS-3'-UTR respectively with HA-HIB, Su(fu) protein levels were compared based on the normalized equal *su(fu)* mRNA. **(B)** S2 cells were plated in 10-cm dishes and treated with or without *hib* RNAi for 8-12h. Cells were treated with Act D to block transcription for 4h before harvesting. After Act D treatment, more Su(fu) protein was translated from the same amount of *su(fu)* mRNA upon knockdown of *hib*. **(C)** Quantification of the western blot analysis of endogenous Su(fu) protein level as determined by ImageJ.
