# Supplementary material
Source: PubMed Central journal article supplement (PMC4011344)
Supplement: cr201429x10.pdf [file cr201429x10.pdf]

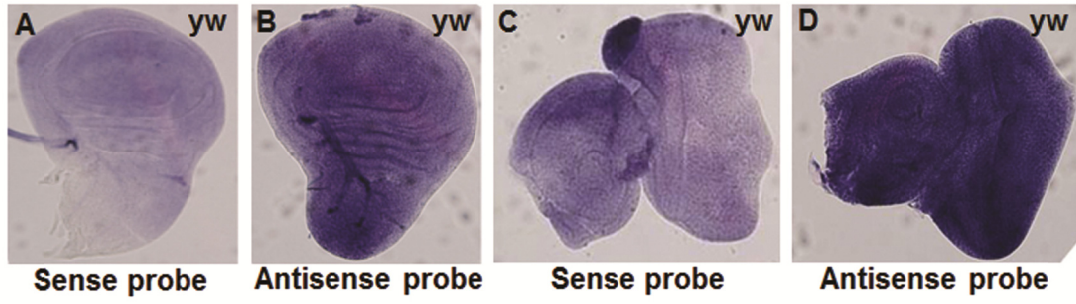

**Supplementary information, Figure S10** Endogenous *crn* is ubiquitously expressed in wing (A, B) and eye (C, D) discs detected by in situ hybridization. (A, C) *crn* sense probe was used as a control. (B, D) *crn* antisense probe was used to detect Crn mRNA signal.
