# Supplementary material
Source: PubMed Central journal article supplement (PMC4011344)
Supplement: cr201429x11.pdf [file cr201429x11.pdf]

**Supplementary information, Table S1** The expression of Su(fu) affected by knockdown of the candidate genes in wing discs. Endogenous Su(fu) levels were checked via immunostaining by anti-Su(fu) antibody in the wing discs upon knockdown of the candidate genes which interact with HIB shown in flyBase.

| <b>Annotation symbol</b> | <b>Name</b>                            | <b>Also known as</b>            | <b>Immunostaining results</b> |
|--------------------------|----------------------------------------|---------------------------------|-------------------------------|
| CG14546                  |                                        |                                 | no                            |
| CG30417                  |                                        |                                 | no                            |
| CG31368                  |                                        |                                 | no                            |
| CG32635                  | Neuropilin and tolloid-like(Neto)      |                                 | no                            |
| CG5380                   |                                        |                                 | no                            |
| CG42334                  | comm3                                  | CG33209                         | no                            |
| CG3193                   | crooked neck(crn)                      | yok, l(1)2, EG:30B8.1           | Su(fu) level upregulation     |
| CG18582                  | mushroom bodies tiny(mbt)              | STE20, dPAK2                    | no                            |
| CG10225                  | Ran binding protein 3(RanBP3)          | RanBP3                          | no                            |
| CG3204                   | Ras-associated protein 2-like(Rap2l)   |                                 | no                            |
| CG1906                   | alphabet                               | SK3-1                           | no                            |
| CG1886                   | ATP7                                   | DmATP7                          | no                            |
| CG12470                  |                                        | EG:BACR37P7.5                   | no                            |
| CG14711                  |                                        |                                 | no                            |
| CG16904                  |                                        |                                 | no                            |
| CG2865                   |                                        | EG:25E8.4                       | no                            |
| CG3557                   |                                        |                                 | no                            |
| CG5288                   | Galactokinase(Galk)                    |                                 | no                            |
| CG6206                   |                                        | BcDNA:GH02419, dLM              | no                            |
| CG6985                   |                                        |                                 | no                            |
| CG7611                   |                                        |                                 | no                            |
| CG8360                   |                                        |                                 | no                            |
| CG9005                   |                                        |                                 | no                            |
| CG9173                   |                                        |                                 | no                            |
| CG7404                   | estrogen-related receptor(ERR)         | dERR                            | no                            |
| CG3114                   | erect wing                             | EC3, EG:BACR37P7.7              | no                            |
| CG1216                   | mrityu(mri)                            |                                 | no                            |
| CG7850                   | puckered(puc)                          | hrt, l(3)84Eh                   | no                            |
| CG7434                   | Ribosomal protein L22(RpL22)           | EG:BACR19J1.4                   | no                            |
| CG6779                   | Ribosomal protein S3(RpS3)             | M(3)w, M(3)95A, S3, dS3, M(3R)w | no                            |
| CG11121                  | sine oculis(so)                        | Drl, mda                        | no                            |
| CG4800                   | Translationally controlled tumor(Tctp) | dTCTP                           | no                            |
| CG10076                  | spire(spir)                            | p150-Spir, Spire                | no                            |
